# Supplementary material for: Higher Brain Uptake of Gentamicin and Ceftazidime under Isoflurane Anesthesia Compared to Ketamine/Xylazine
Source: MDPI journal article supplement (doi:10.3390/pharmaceutics16010135), 2024-01-19
Supplement: s1 [file s1]

## Supplementary Materials

**Table S1. Accuracy and precision for plasma samples**

| Analytes    | Spiked concentration (ng/mL) | Intra-day                      |        |              |                    | Inter-day                      |        |              |                    |
|-------------|------------------------------|--------------------------------|--------|--------------|--------------------|--------------------------------|--------|--------------|--------------------|
|             |                              | Measured concentration (ng/mL) | STD DV | Accuracy (%) | Precision (RSD, %) | Measured concentration (ng/mL) | STD DV | Accuracy (%) | Precision (RSD, %) |
| Ceftazidime | 10                           | 10.37                          | 1.08   | 103.70       | 10.4               | 10.57                          | 1.00   | 105.70       | 9.6                |
|             | 20                           | 20.13                          | 1.00   | 100.65       | 5.0                | 19.58                          | 1.46   | 97.90        | 7.4                |
|             | 100                          | 100.38                         | 8.68   | 100.38       | 8.7                | 96.85                          | 7.74   | 96.85        | 8.0                |
|             | 1000                         | 1032.54                        | 104.90 | 103.25       | 10.2               | 1007.69                        | 87.02  | 100.77       | 8.6                |
| Gentamicin  | 20                           | 21.88                          | 1.76   | 109.41       | 8.04               | 21.89                          | 2.46   | 109.46       | 11.22              |
|             | 100                          | 103.01                         | 2.82   | 103.01       | 2.74               | 99.60                          | 6.34   | 99.60        | 6.37               |
|             | 500                          | 528.14                         | 26.34  | 105.63       | 4.99               | 519.27                         | 36.51  | 103.85       | 7.03               |
|             | 800                          | 897.55                         | 30.91  | 112.19       | 3.44               | 823.88                         | 81.00  | 103.02       | 9.83               |

**Table S2. Accuracy and precision for brain samples**

| Analytes    | Spiked concentration (ng/mL) | Intra-day                      |        |              |                    | Inter-day                      |        |              |                    |
|-------------|------------------------------|--------------------------------|--------|--------------|--------------------|--------------------------------|--------|--------------|--------------------|
|             |                              | Measured concentration (ng/mL) | STD DV | Accuracy (%) | Precision (RSD, %) | Measured concentration (ng/mL) | STD DV | Accuracy (%) | Precision (RSD, %) |
| Ceftazidime | 10                           | 10.37                          | 1.08   | 103.7        | 10.4               | 10.57                          | 1      | 105.7        | 9.6                |
|             | 20                           | 20.13                          | 1      | 100.65       | 5                  | 19.58                          | 1.46   | 97.9         | 7.4                |
|             | 100                          | 100.38                         | 8.68   | 100.38       | 8.7                | 96.85                          | 7.74   | 96.85        | 8                  |
|             | 1000                         | 1032.54                        | 104.9  | 103.25       | 10.2               | 1007.69                        | 87.02  | 100.77       | 8.6                |
| Gentamicin  | 20                           | 21.88                          | 1.76   | 109.41       | 8.04               | 21.89                          | 2.46   | 109.46       | 11.22              |
|             | 100                          | 103.01                         | 2.82   | 103.01       | 2.74               | 99.6                           | 6.34   | 99.6         | 6.37               |
|             | 500                          | 528.14                         | 26.34  | 105.63       | 4.99               | 519.27                         | 36.51  | 103.85       | 7.03               |
|             | 800                          | 897.55                         | 30.91  | 112.19       | 3.44               | 823.88                         | 81     | 103.02       | 9.83               |

**Table S3. Recovery for brain and plasma**

| Ceftazidime                  |                                     |                              |                                    | Gentamicin                   |                                     |                                    |
|------------------------------|-------------------------------------|------------------------------|------------------------------------|------------------------------|-------------------------------------|------------------------------------|
| Spiked concentration (ng/mL) | Plasma Recovery (% , mean $\pm$ SD) | Spiked concentration (ng/mL) | Brain Recovery (% , mean $\pm$ SD) | Spiked concentration (ng/mL) | Plasma Recovery (% , mean $\pm$ SD) | Brain Recovery (% , mean $\pm$ SD) |
| 10                           | 96.2 $\pm$ 6.2                      | 5                            | 89.9 $\pm$ 10.6                    | 10                           | 92.7 $\pm$ 10.2                     | 81.5 $\pm$ 0.6                     |
| 100                          | 102.0 $\pm$ 4.8                     | 50                           | 94.4 $\pm$ 9.8                     | 100                          | 102.7 $\pm$ 0.3                     | 90.2 $\pm$ 3.9                     |
| 1000                         | 93.7 $\pm$ 7.3                      | 400                          | 91.0 $\pm$ 10.3                    | 1000                         | 88.5 $\pm$ 3.2                      | 100.8 $\pm$ 2.4                    |

**Table S4. Long-term stability test in plasma and brain**

| Analytes    | Spiked concentration (ng/mL) | Long-term stability in plasma  |              |                    | Long-term stability in brain   |              |                    |
|-------------|------------------------------|--------------------------------|--------------|--------------------|--------------------------------|--------------|--------------------|
|             |                              | Measured Concentration (ng/mL) | Accuracy (%) | Precision (RSD, %) | Measured Concentration (ng/mL) | Accuracy (%) | Precision (RSD, %) |
| Ceftazidime | 10                           | 9.8                            | 98.4         | 3.9                | 10.6                           | 106.3        | 9.9                |
|             | 100                          | 92.3                           | 92.3         | 8                  | 88                             | 88           | 2.3                |
|             | 1000                         | 925.1                          | 92.5         | 6.9                | 956.5                          | 95.7         | 12                 |
| Gentamicin  | 10                           | 9.1                            | 91           | 13.5               | 9.8                            | 98           | 2.1                |
|             | 100                          | 101.3                          | 101.3        | 0.5                | 105.8                          | 105.8        | 1.5                |
|             | 1000                         | 1101.8                         | 110.2        | 2.9                | 1030.8                         | 103.1        | 3.7                |

**A)**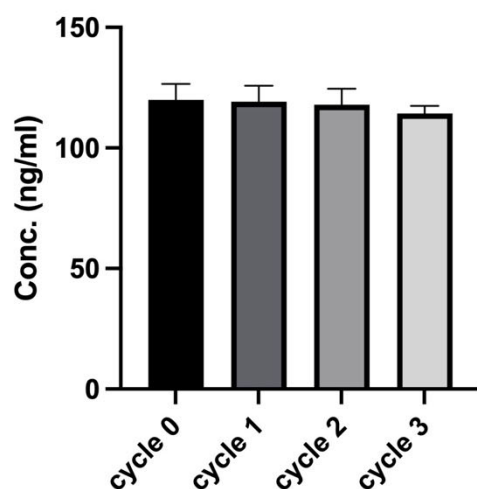**B)**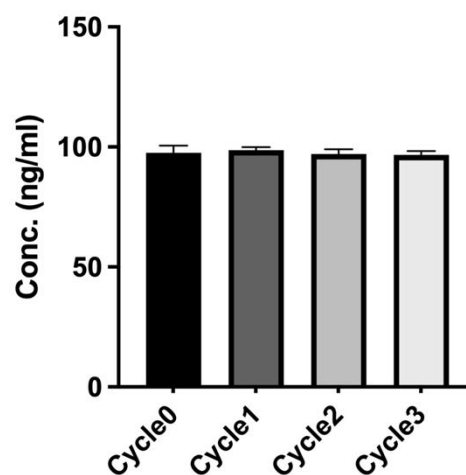**Freeze-thaw cycles**

**Figure S1. Freeze-thaw stability results for ceftazidime (A) and gentamicin (B).** Samples were prepared at a concentration of 100ng/mL in neat and underwent freeze-thaw cycles up to three times. Cycle 0 and calibration samples were freshly prepared on the same day of analysis. Three replicates of samples from each cycle were evaluated for statistical analysis. The sensitivity for detecting both drugs was not significantly decreased after three times of the freeze-thaw process. Graphs show means  $\pm$  95% CI. Statistical analysis by one-way ANOVA,  $P > 0.05$ ,  $n = 3$ .
